# Supplementary material for: Strong and pure red-emitting Eu3+-doped phosphor with excellent thermal stability for warm WLEDs
Source: Royal Society of Chemistry journal article supplement (doi:10.1039/d1ma01221e), 2022-01-01
Supplement: d1ma01221e1.pdf [file d1ma01221e1.pdf]

## Strong and pure red-emitting $\text{Eu}^{3+}$ -doped phosphor with excellent thermal stability for warm WLEDs

Liang Zhang,<sup>a, b</sup> Yonghui Xu,<sup>a, b</sup> Xiudi Wu,<sup>a, b</sup> Shuwen Yin,<sup>a</sup> and Hongpeng You<sup>a, b, c\*</sup>

<sup>a</sup> State Key Laboratory of Rare Earth Resource Utilization, Changchun Institute of Applied Chemistry, Chinese Academy of Sciences, Changchun 130022, P. R. China

<sup>b</sup> University of Science and Technology of China, Hefei 230026, P. R. China

<sup>c</sup> Ganjiang Innovation Academy, Chinese Academy of Sciences, Ganzhou 341000, China

\*Corresponding author. Fax: +86 431 85698041. E-mail address: [hpyou@ciac.ac.cn](mailto:hpyou@ciac.ac.cn) (H.P.

You).

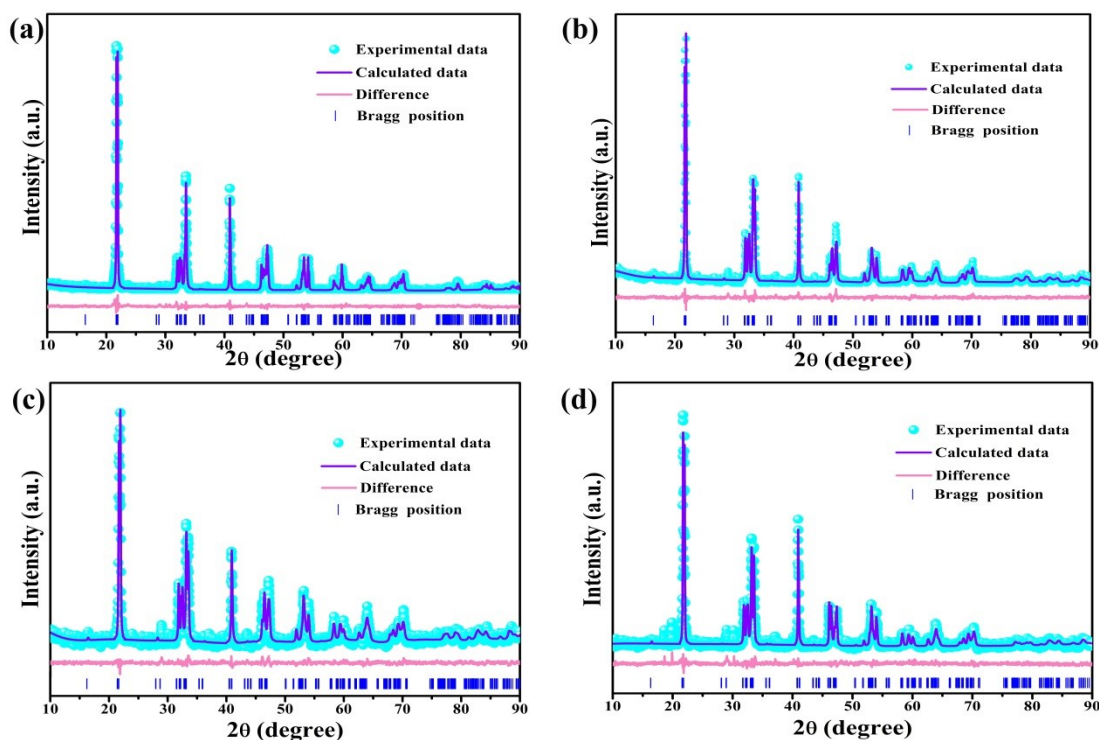

Fig. S1 Rietveld refinements of the  $\text{LiYO}_2:\text{xEu}^{3+}$  with  $x = 0.25, 0.30, 0.35, 0.40$  (a-d), respectively.

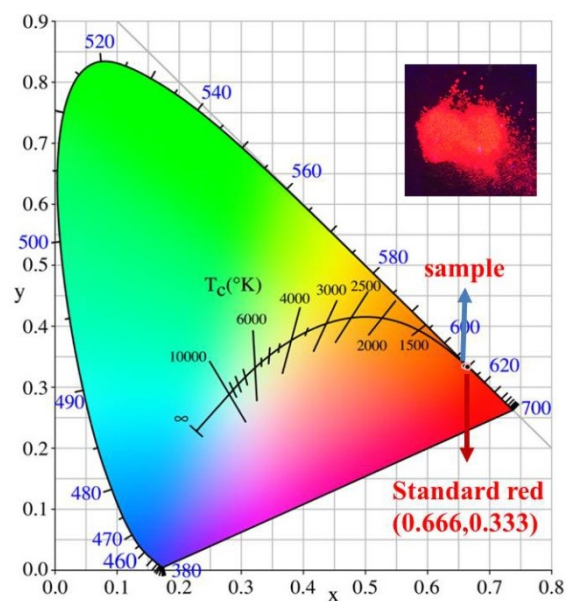

Fig. S2 CIE coordinates profile of  $\text{LiYO}_2:\text{xEu}^{3+}$  ( $x = 0.15\text{-}0.40$ ) samples, the inset pictures are the phosphors under the 365 nm blue light excitation in dark background.

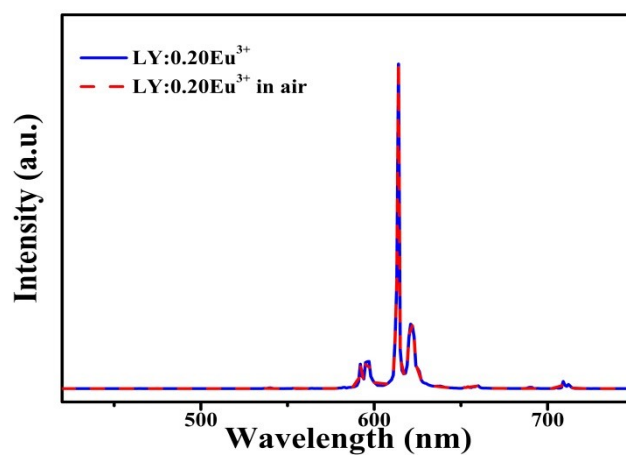

Fig. S3 Emission spectrum of the  $\text{LY:0.20Eu}^{3+}$  sample and the  $\text{LY:0.20Eu}^{3+}$  sample placed in the air for two weeks

Table S1 Refined structural data of  $\text{LiYO}_2:\text{xEu}^{3+}$  samples.

| x    | a, Å     | b, Å     | c, Å     | V, Å <sup>3</sup> | Rwp, % | Rp, % | X <sup>2</sup> |
|------|----------|----------|----------|-------------------|--------|-------|----------------|
| 0.15 | 6.167667 | 6.185144 | 6.264522 | 208.924           | 5.68   | 4.45  | 2.014          |
| 0.20 | 6.173124 | 6.180048 | 6.273077 | 209.111           | 5.46   | 4.16  | 2.351          |

|      |          |          |          |         |      |      |       |
|------|----------|----------|----------|---------|------|------|-------|
| 0.25 | 6.191825 | 6.177590 | 6.298832 | 210.275 | 4.86 | 3.77 | 1.822 |
| 0.30 | 6.208351 | 6.175650 | 6.319654 | 211.283 | 5.24 | 4.06 | 1.955 |
| 0.35 | 6.219486 | 6.174877 | 6.334198 | 212.028 | 5.47 | 4.25 | 1.885 |
| 0.40 | 6.227838 | 6.169772 | 6.344096 | 212.327 | 5.06 | 3.77 | 2.082 |

Table S2 the Y-O bond length of  $\text{LiYO}_2:\text{xEu}^{3+}$  samples

| x    | Y-O1 (Å) |         |         | Y-O2 (Å) |         |         | Average<br>(Å) |
|------|----------|---------|---------|----------|---------|---------|----------------|
| 0.15 | 2.22612  | 2.24311 | 2.41807 | 2.23319  | 2.23491 | 2.42366 | 2.29651        |
| 0.20 | 2.22729  | 2.24320 | 2.42135 | 2.23357  | 2.23556 | 2.42712 | 2.29801        |
| 0.25 | 2.22830  | 2.24567 | 2.43124 | 2.23503  | 2.23747 | 2.43742 | 2.30352        |
| 0.30 | 2.22938  | 2.24795 | 2.43945 | 2.23640  | 2.23940 | 2.44588 | 2.30641        |
| 0.35 | 2.23043  | 2.24991 | 2.44490 | 2.23768  | 2.24109 | 2.45152 | 2.30925        |
| 0.40 | 2.22917  | 2.24992 | 2.44923 | 2.23713  | 2.24097 | 2.45593 | 2.31049        |

Table S3 The atom positions and fraction factors of LY:xEu<sup>3+</sup> (x = 0.15, 0.20, 0.25, 0.30, 0.35, 0.40)

samples.

| Atom          | Site | x    | y     | z    | Occupancy |
|---------------|------|------|-------|------|-----------|
| <b>x=0.15</b> |      |      |       |      |           |
| Li            | 4e   | 0.25 | 0.625 | 0    | 1         |
| Y             | 4e   | 0.25 | 0.125 | 0    | 0.85      |
| Eu            | 4e   | 0.25 | 0.125 | 0    | 0.15      |
| O1            | 4e   | 0    | 0.15  | 0.20 | 1         |
| O2            | 4e   | 0.45 | 0.10  | 0.75 | 1         |
| <b>x=0.20</b> |      |      |       |      |           |
| Li            | 4e   | 0.25 | 0.625 | 0    | 1         |
| Y             | 4e   | 0.25 | 0.125 | 0    | 0.80      |
| Eu            | 4e   | 0.25 | 0.125 | 0    | 0.20      |
| O1            | 4e   | 0    | 0.15  | 0.20 | 1         |
| O2            | 4e   | 0.45 | 0.10  | 0.75 | 1         |
| <b>x=0.25</b> |      |      |       |      |           |
| Li            | 4e   | 0.25 | 0.625 | 0    | 1         |
| Y             | 4e   | 0.25 | 0.125 | 0    | 0.75      |
| Eu            | 4e   | 0.25 | 0.125 | 0    | 0.25      |
| O1            | 4e   | 0    | 0.15  | 0.20 | 1         |
| O2            | 4e   | 0.45 | 0.10  | 0.75 | 1         |

| <b>x=0.30</b> |           |      |       |      |      |
|---------------|-----------|------|-------|------|------|
| Li            | <i>4e</i> | 0.25 | 0.625 | 0    | 1    |
| Y             | <i>4e</i> | 0.25 | 0.125 | 0    | 0.70 |
| Eu            | <i>4e</i> | 0.25 | 0.125 | 0    | 0.30 |
| O1            | <i>4e</i> | 0    | 0.15  | 0.20 | 1    |
| O2            | <i>4e</i> | 0.45 | 0.10  | 0.75 | 1    |
| <b>x=0.35</b> |           |      |       |      |      |
| Li            | <i>4e</i> | 0.25 | 0.625 | 0    | 1    |
| Y             | <i>4e</i> | 0.25 | 0.125 | 0    | 0.65 |
| Eu            | <i>4e</i> | 0.25 | 0.125 | 0    | 0.35 |
| O1            | <i>4e</i> | 0    | 0.15  | 0.20 | 1    |
| O2            | <i>4e</i> | 0.45 | 0.10  | 0.75 | 1    |
| <b>x=0.40</b> |           |      |       |      |      |
| Li            | <i>4e</i> | 0.25 | 0.625 | 0    | 1    |
| Y             | <i>4e</i> | 0.25 | 0.125 | 0    | 0.60 |
| Eu            | <i>4e</i> | 0.25 | 0.125 | 0    | 0.40 |
| O1            | <i>4e</i> | 0    | 0.15  | 0.20 | 1    |
| O2            | <i>4e</i> | 0.45 | 0.10  | 0.75 | 1    |

Table S4 the chromaticity coordinates and color purity of  $\text{LiYO}_2:\text{xEu}^{3+}$  samples

| x | y | Color purity |
|---|---|--------------|
|---|---|--------------|

|      |       |       |        |
|------|-------|-------|--------|
| 0.15 | 0.663 | 0.335 | 0.9918 |
| 0.20 | 0.662 | 0.335 | 0.9888 |
| 0.25 | 0.663 | 0.335 | 0.9918 |
| 0.30 | 0.663 | 0.335 | 0.9918 |
| 0.35 | 0.664 | 0.335 | 0.9948 |
| 0.40 | 0.663 | 0.334 | 0.9918 |

Table S5 Comparison of excitation position, IQE and thermal stability ( $I_{298\text{ K}/423\text{ K}}$ ) for  $\text{LiYO}_2:0.20\text{Eu}^{3+}$  and other reported  $\text{Eu}^{3+}$ -doped phosphors and typical commercial red phosphors

| Phosphors                                                                 | $\lambda_{\text{ex}}$<br>(nm) | Emission intensity<br>(423 K) | IQE    | Ref.      |
|---------------------------------------------------------------------------|-------------------------------|-------------------------------|--------|-----------|
| $\text{Y}_2\text{Mg}_2\text{Al}_2\text{Si}_2\text{O}_{12}:\text{Eu}^{3+}$ | 393                           | 88.5%                         | 60.50% | 1         |
| $\text{Y}_3\text{Al}_5\text{O}_{12}:\text{Eu}^{3+}$                       | 393                           | 88.9%                         | 23.73% | 1         |
| $\text{Sr}_2\text{LaNbO}_6:\text{Eu}^{3+}$                                | 394                           | 62.99%                        | 33.51% | 2         |
| $\text{Ca}_2\text{GdTao}_6:\text{Eu}^{3+}$                                | 396                           | 78%                           | 82%    | 3         |
| $\text{BaGe}_4\text{O}_9:\text{Eu}^{3+}$                                  | 394                           | -                             | 57.9%  | 4         |
| $\text{LaSc}_3(\text{BO}_3)_4:\text{Eu}^{3+}$                             | 393                           | 82%                           | 89%    | 5         |
| $\text{LY}:0.20\text{Eu}^{3+}$                                            | 395                           | 89%                           | 75%    | This work |

## References

1. X. Zhang, T. Shen, D. Kan, D. Zhang, R. Dong, Z. An, Y. Song, K. Zheng, Y. Sheng, Z. Shi and H. Zou, *Inorg. Chem.*, 2020, 59, 9927-9937.
2. Y. Hua, W. Ran and J. S. Yu, *Chem. Eng. J.*, 2021, 406, 127154.
3. S. Wang, Q. Sun, B. Devakumar, J. Liang, L. Sun and X. Huang, *J. Alloy. Compd.*, 2019, 804, 93-99.

4. C. Ji, Z. Huang, X. Tian, W. Xie, J. Wen, H. He, C. Zhou and T. Zeng, *Dyes Pigments*, 2019, 160, 772-778.
5. N. Yang, J. Li, Z. Zhang, D. Wen, Q. Liang, J. Zhou, J. Yan and J. Shi, *Chem. Mater.*, 2020, 32, 6958-6967.
